# Supplementary material
Source: Springer Nature journal article supplement (https://www.springermedizin.de/resource/supplementary/12963_2012_204_MOESM2_ESM.pdf/9572338)

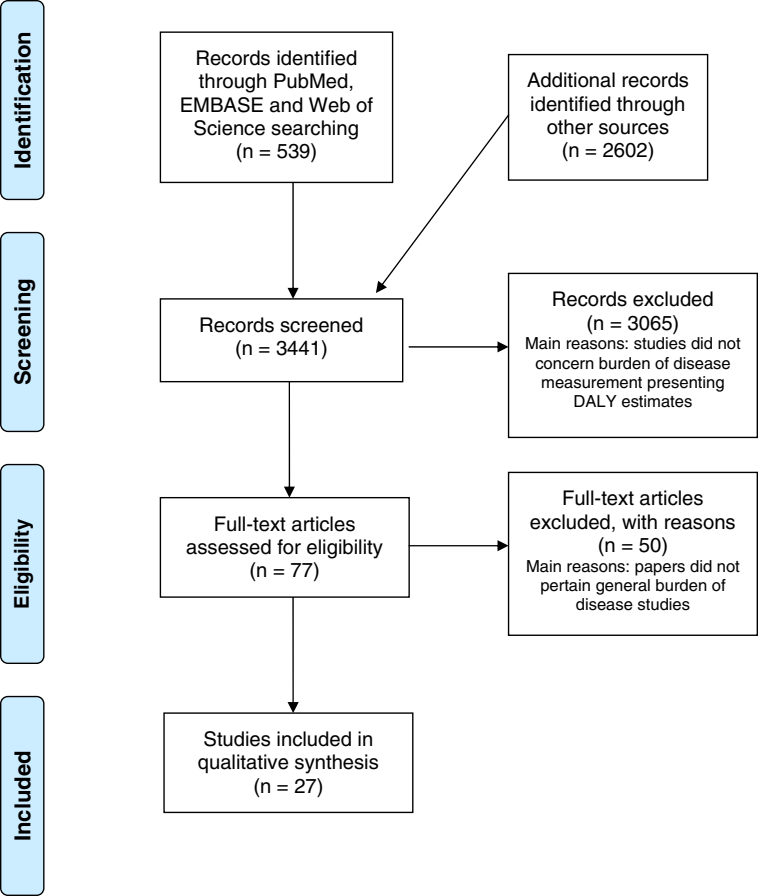

Supplement: MOESM2 [file 9572338]
